# Supplementary material for: Cleaner technology for the production of linear long-chain α-olefins through a “millisecond” oxidative cracking process: a positive impact of the reactant carbon chain length
Source: Royal Society of Chemistry journal article supplement (doi:10.1039/d1nj05910f), 2022-01-01
Supplement: d1nj05910f1.pdf [file d1nj05910f1.pdf]

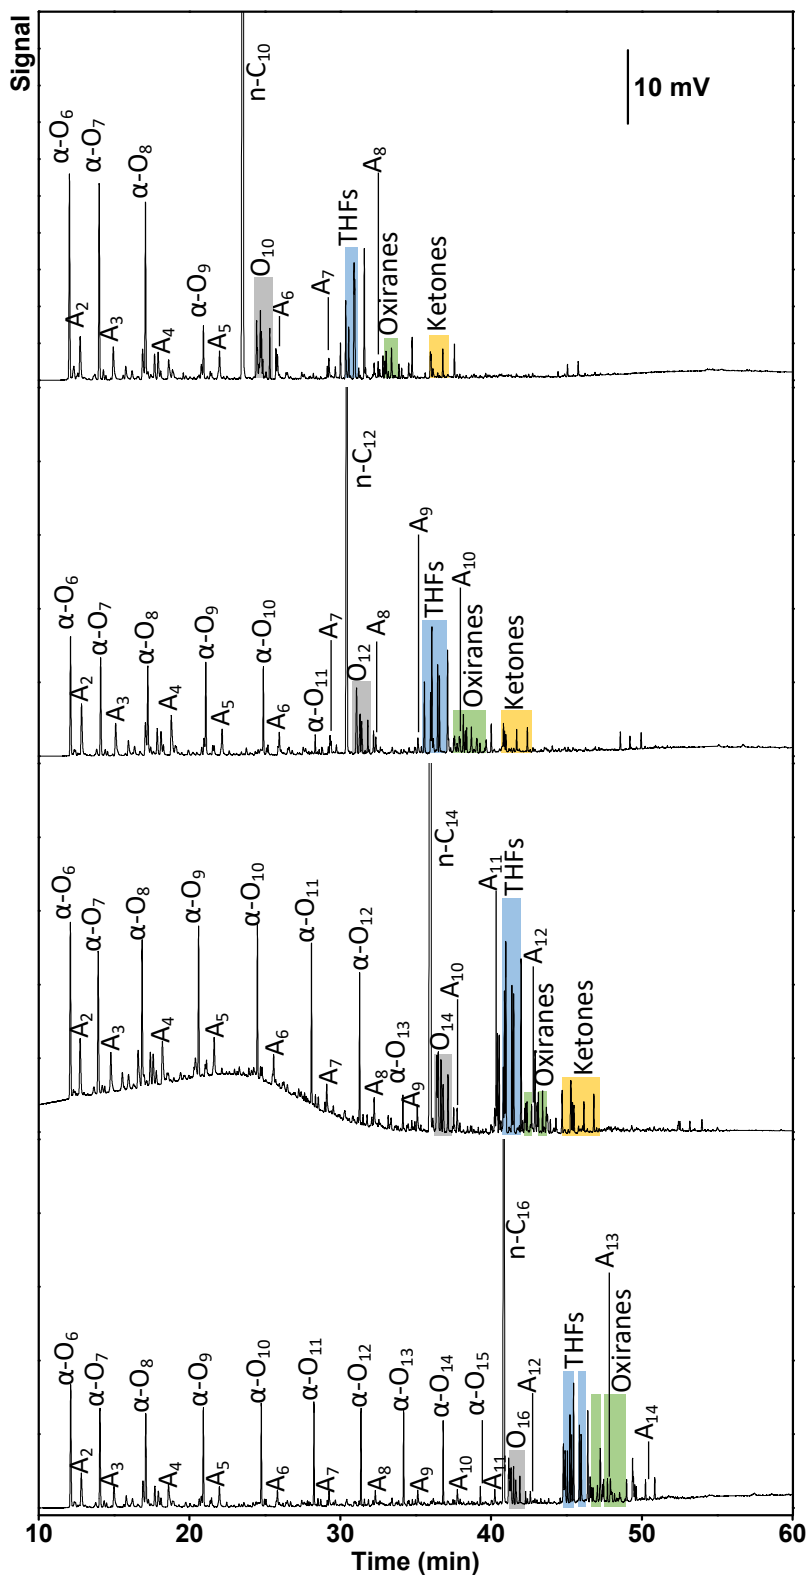

**Figure SI. 1:** Examples of labelled peak chromatograms of heavy products from n decane, n dodecane, n tetradecane, and n hexadecane oxidative cracking.
